# Supplementary material
Source: PubMed Central journal article supplement (PMC4793447)
Supplement: birs014310.ww_default.pdf [file birs014310.ww_default.pdf]

## Web appendix: Sensitivity analyses

**Sensitivity Analysis 1:** Risk for hypotension with tamsulosin using the self-controlled case series approach and restricting the analysis only to the first hypotension event.

|                                 | Total N | Events N | Person-Years | Rate/100<br>Person-Years | Rate Ratio (95%CI)  |
|---------------------------------|---------|----------|--------------|--------------------------|---------------------|
| <b>Model 1: Cohort Analysis</b> |         |          |              |                          |                     |
| New Use (weeks 1-4)             | 2248    | 179      | 167          | 107.2                    | 2.76 (2.31 to 3.30) |
| New Use (weeks 5-8)             | 2076    | 74       | 118          | 62.7                     | 1.76 (1.37 to 2.27) |
| New Use (weeks 9-12)            | 1404    | 63       | 116          | 54.3                     | 1.62 (1.23 to 2.13) |
| Restarting therapy (weeks 1-4)  | 1104    | 74       | 181          | 40.9                     | 1.67 (1.30 to 2.14) |
| Restarting therapy (weeks 5-8)  | 1070    | 69       | 172          | 40.1                     | 1.72 (1.33 to 2.23) |
| Restarting therapy (weeks 9-12) | 912     | 39       | 133          | 29.3                     | 1.27 (0.91 to 1.78) |
| Maintenance Therapy             | 1357    | 520      | 1923         | 27.0                     | 1.42 (1.23 to 1.65) |

This sensitivity analysis was conducted to examine the difference in point estimates after restricting the analysis to allowing only one hypotension event. It was done to examine for a potential violation of the exposure dependent event assumption in the self-controlled case series. The similar point estimates with this sensitivity analysis indicate bias from a violation of this assumption is unlikely.

**Sensitivity Analysis 2:** Risk for hypotension with tamsulosin using the self-controlled case series approach and adjusting for age in 5-year bands (n-1 parameters) and calendar time in 1-year bands (n-1 parameters).

|                                 | Total N | Events N | Person-Years | Rate/10,000<br>Person-Years | Rate Ratio (95%CI)  |
|---------------------------------|---------|----------|--------------|-----------------------------|---------------------|
| <b>Model 1: Cohort Analysis</b> |         |          |              |                             |                     |
| New Use (weeks 1-4)             | 2248    | 185      | 167          | 110.8                       | 2.49 (2.10 to 2.97) |
| New Use (weeks 5-8)             | 2076    | 79       | 118          | 66.9                        | 1.62 (1.27 to 2.06) |
| New Use (weeks 9-12)            | 1404    | 68       | 116          | 58.6                        | 1.50 (1.15 to 1.95) |
| Restarting therapy (weeks 1-4)  | 1104    | 80       | 181          | 44.2                        | 1.57 (1.25 to 2.00) |
| Restarting therapy (weeks 5-8)  | 1070    | 74       | 172          | 43.0                        | 1.58 (1.23 to 2.03) |
| Restarting therapy (weeks 9-12) | 912     | 42       | 133          | 31.6                        | 1.18 (0.85 to 1.62) |
| Maintenance Therapy             | 1357    | 651      | 1923         | 33.9                        | 1.35 (1.19 to 1.55) |

In this sensitivity analysis, exposures are defined daily to reduce potential misclassification of drug exposure which could produce a bias toward the null. Second, age and calendar year are defined in larger brackets to allow risk to vary by age range and calendar year.
